# Supplementary material for: Renin Trajectories and Outcome in Stable Heart Failure with Reduced Ejection Fraction (HFrEF) on Contemporary Therapy: A Monocentric Study from an Austrian Tertiary Hospital Outpatient Clinic
Source: Hindawi journal article supplement (doi:10.1155/2023/8883145), 2023-01-01

**Supplemental Files:**

**Supplementary Figure 1. Subgroup analysis of baseline renin with all-cause mortality and unplanned HF hospitalizations.** Crude HR with 95% CI are presented for subgroups of age, sex, eGFR, systolic blood pressure (SBP) and NYHA functional class.

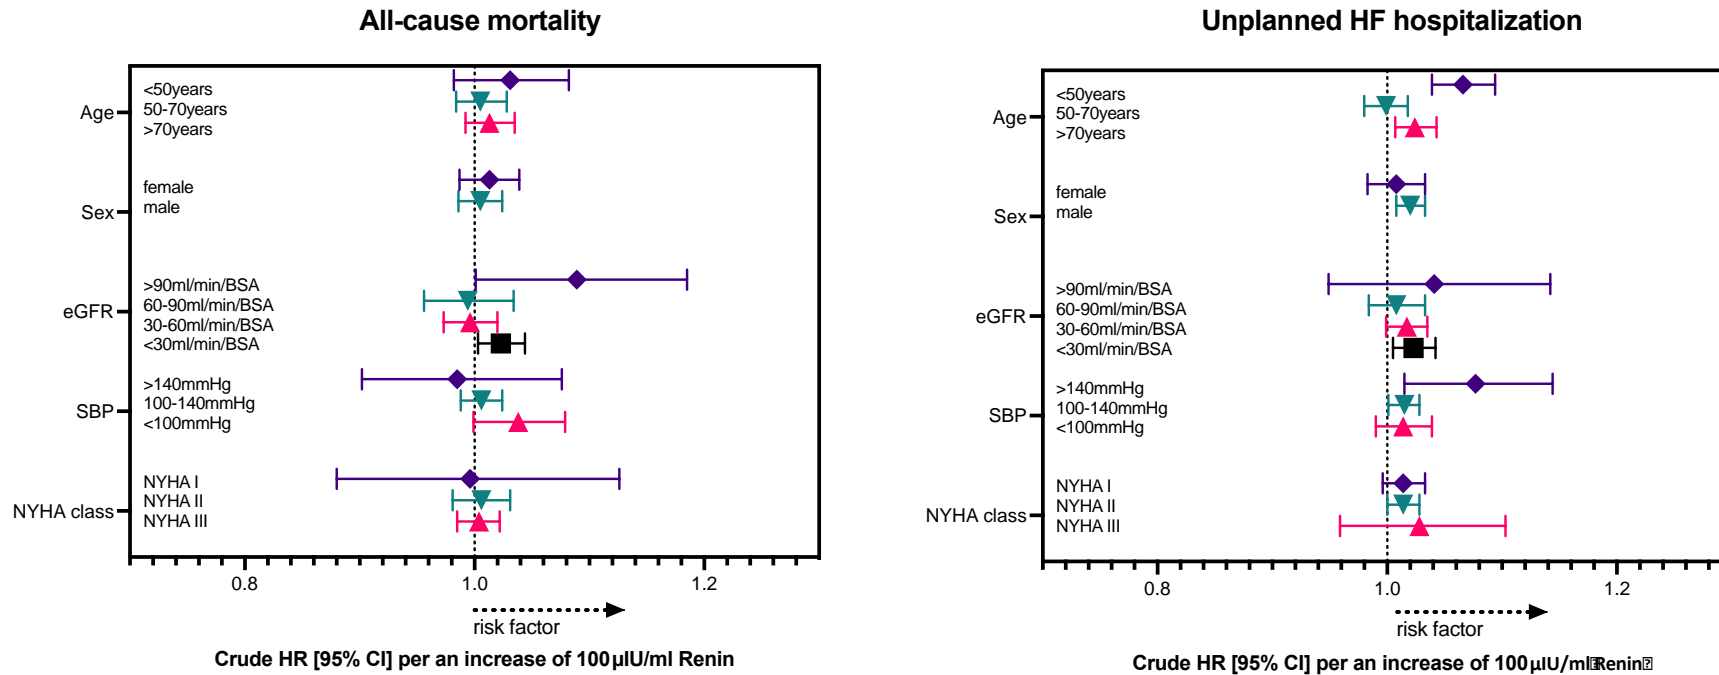

**Supplementary Figure 2. Comparison of survival and unplanned HF hospitalization free survival of patients grouped by <50%, >50% and +50% of change in renin concentration at 1-year compared to baseline and grouped by renin elevation of more than 100 $\mu$ U/ml. The difference between groups was assessed by the log-rank test.**

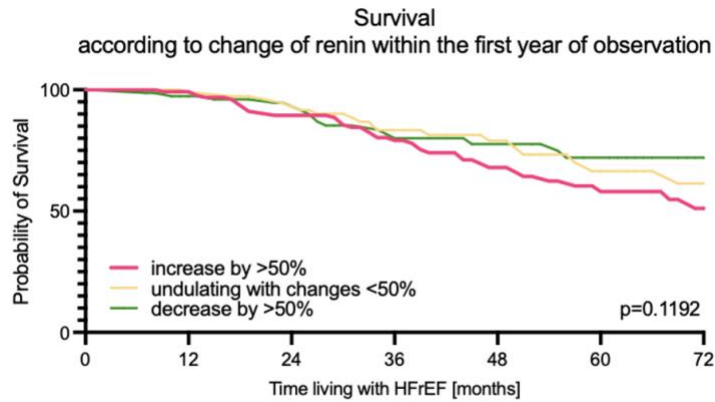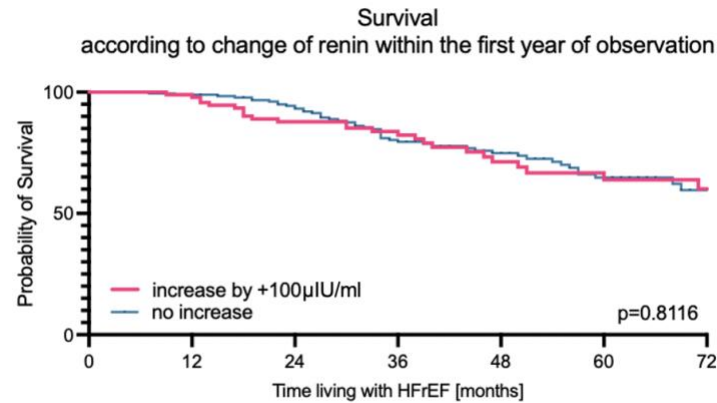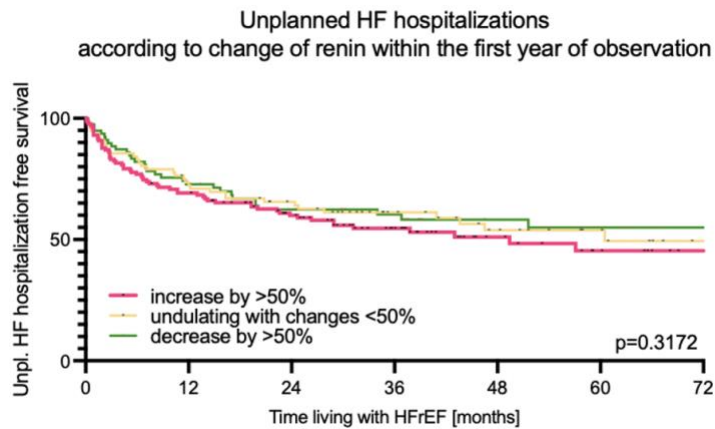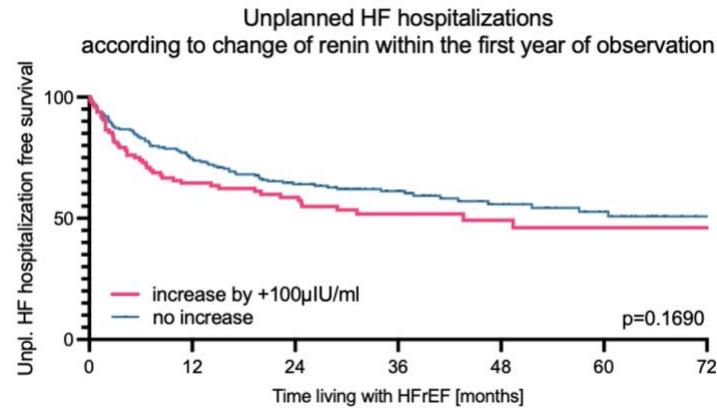

Supplement: f1 [file 8883145.f1.pdf]
